# Supplementary material
Source: PubMed Central journal article supplement (PMC3859422)
Supplement: JCI70877sd.pdf [file JCI70877sd.pdf]

## **Induced autophagy ameliorates cardiac proteinopathy**

Md. Shenuarin Bhuiyan,<sup>1</sup> J. Scott Pattison,<sup>2</sup> Hanna Osinska,<sup>1</sup> Jeanne James,<sup>1</sup> James Gulick,<sup>1</sup>  
Patrick M McLendon,<sup>1</sup> Joseph A Hill,<sup>3</sup> Junichi Sadoshima,<sup>4</sup> and Jeffrey Robbins<sup>1\*</sup>

## **SUPPLEMENTAL DATA**

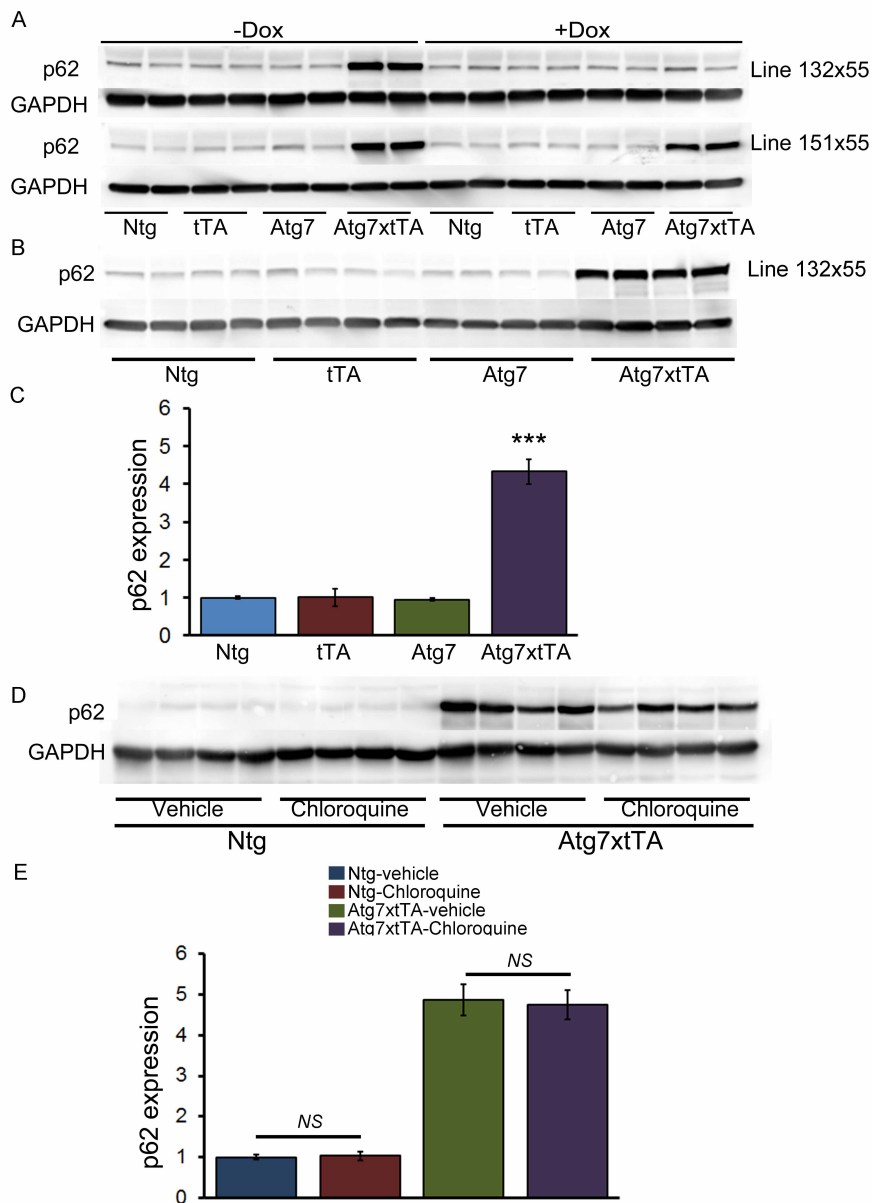

**Supplemental Figure 1:** Atg7 expression-dependent changes of p62 levels in Atg7xtTA hearts. **(A)** Representative Western blot showing p62 protein expression in cardiac extracts from lines 132 and 151 at 3-months as indicated. **(B)** Western blot showing p62 protein expression in the hearts of 3-month-old Atg7xtTA double Tg and control mice. **(C)** Quantitation of p62 expression for line 132. **\*\*\***,  $P < 0.001$  versus Ntg, tTA and Atg7 Tg mice by Tukey's *post hoc* test. **(D)** Western blot showing p62 protein expression in the Atg7xtTA and control Ntg hearts after treatment with chloroquine ( $n = 4/\text{treatment}$ ). **(E)** Densitometry analysis (mean  $\pm$  S.E.M) showed no significant changes (NS) in p62/GAPDH expression as a result of chloroquine treatment.

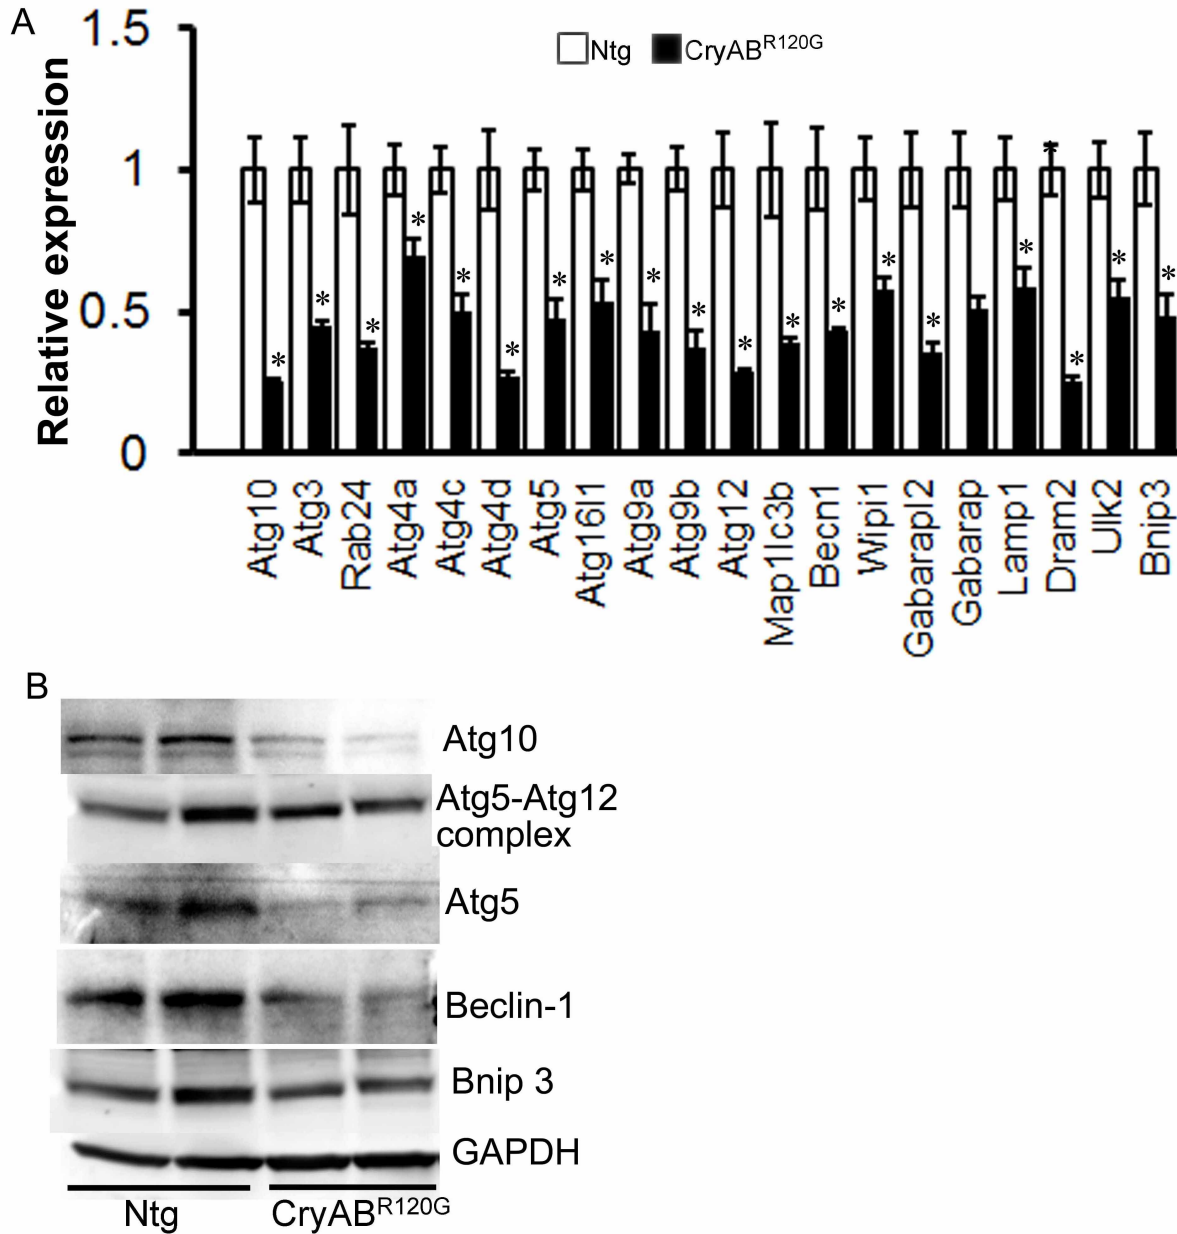

**Supplemental Figure 2:** Autophagy PCR array in CryAB<sup>R120G</sup> hearts. **(A)** Graph representing direct group wise comparison of fold change in mRNA levels in male CryAB<sup>R120G</sup> and control Ntg hearts at 5 months (fold change versus Ntg control, n = 3 per group). All values are reported as mean  $\pm$  S.E.M. \* $P < 0.05$  by Student's  $t$  test. **(B)** Western blot confirmation of the protein-level changes of selected upregulated transcripts detected in Panel A.

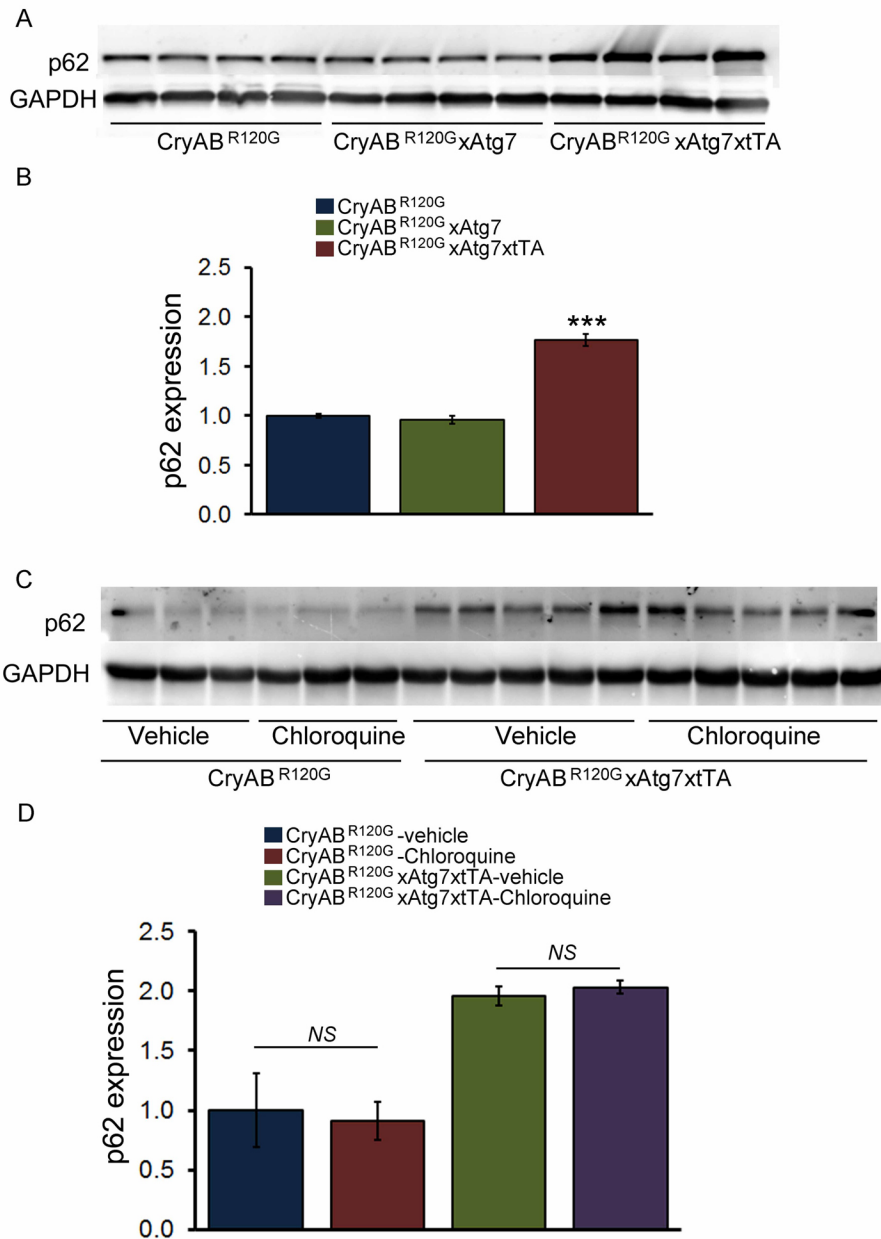

**Supplemental Figure 3:** p62 levels in Atg7 induced CryAB<sup>R120G</sup> triple Tg hearts. **(A)** Western blot showing p62 protein levels in the hearts of 5-month-old CryAB<sup>R120G</sup>xAtg7xtTA and control Tg mice. **(B)** Quantitation of p62 levels in CryAB<sup>R120G</sup>xAtg7xtTA and control Tg mice. \*\*\*,  $P < 0.001$  versus CryAB<sup>R120G</sup> and CryAB<sup>R120G</sup>xAtg7 Tg mice by Tukey's *post hoc* test. **(C)** Western blot showing p62 protein levels in CryAB<sup>R120G</sup>xAtg7xtTA and CryAB<sup>R120G</sup> hearts after treatment with chloroquine ( $n = 3/\text{treatment}$ ). **(D)** Densitometry analysis (mean  $\pm$  S.E.M) showed no significant changes (NS) in p62/GAPDH values in the CryAB<sup>R120G</sup>xAtg7xtTA and CryAB<sup>R120G</sup> mice after treatment with chloroquine.

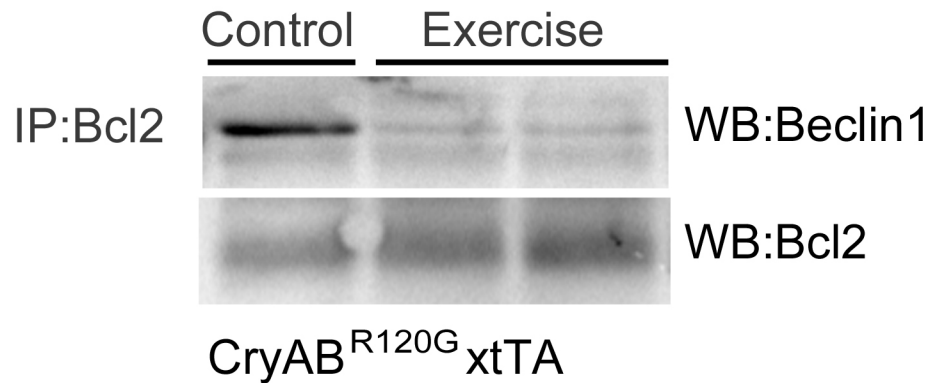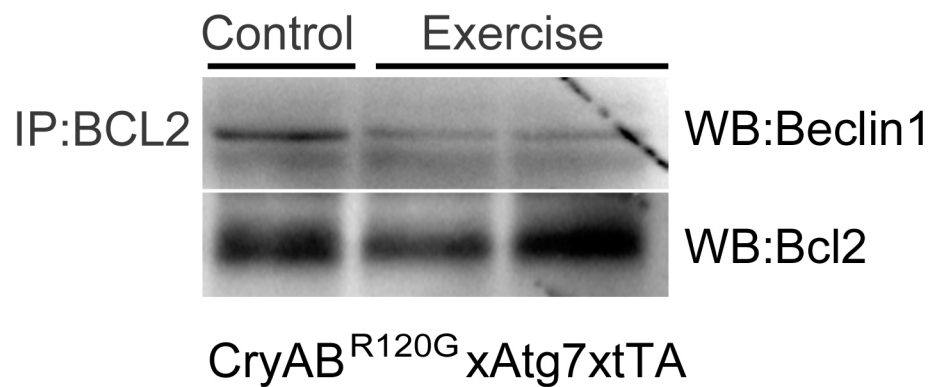

**Supplemental Figure 4:** Bcl2 and Beclin 1 interaction. Co-immunoprecipitation of Beclin1 with Bcl2 in cardiac tissue from voluntary exercised and control mice from both CryAB<sup>R120G</sup>xtTA and CryAB<sup>R120G</sup>xAtg7xtTA mice. IP, immunoprecipitate; WB, western blot.

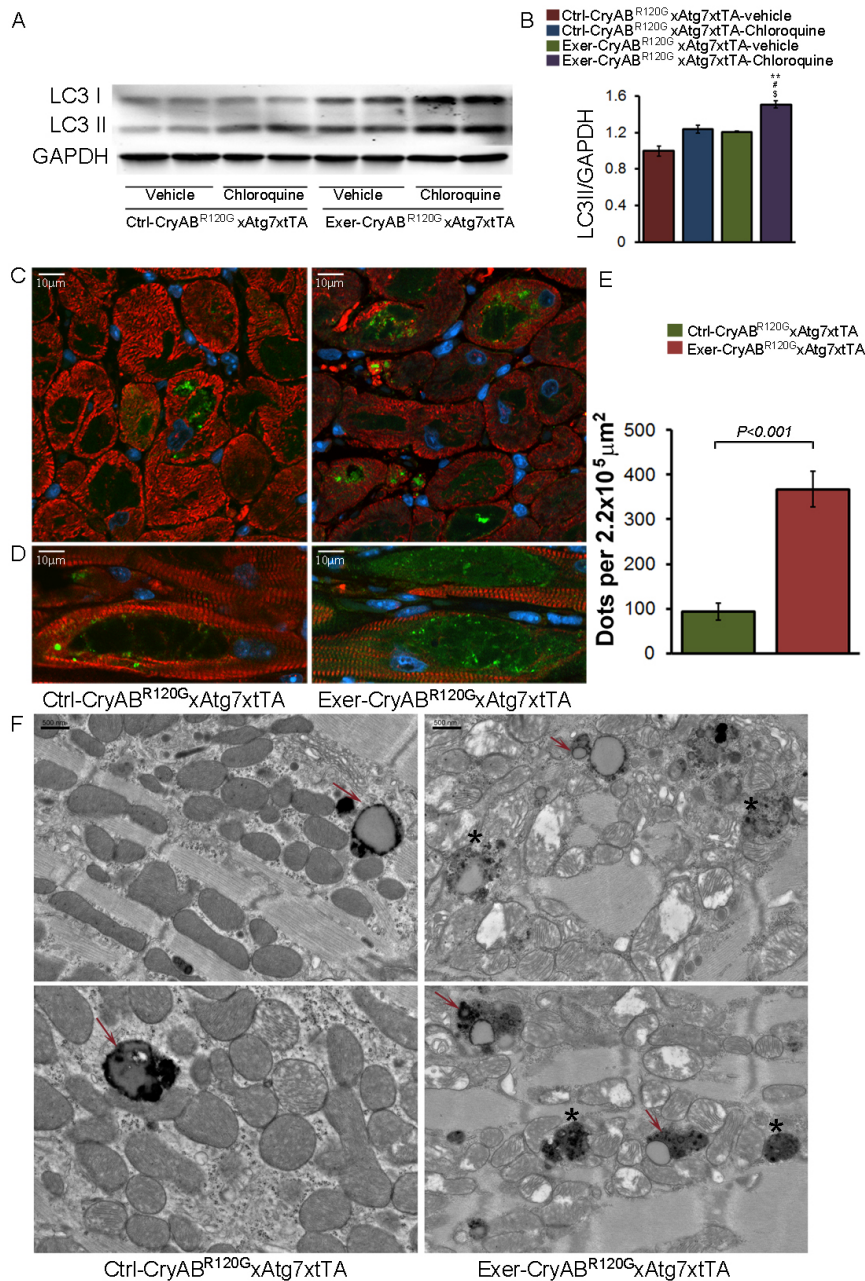

**Supplement Figure 5:** Autophagy flux analysis in exercised Atg7 induced CryAB<sup>R120G</sup> triple Tg hearts. **(A)** An autophagic flux assay showed increased LC3-II levels by Western blot analysis in Atg7 crossed CryAB<sup>R120G</sup> hearts after voluntary exercise (n =4/treatment). **(B)** Densitometry analysis (mean ± S.E.M) showed increased LC3II/GAPDH values in the exercised Atg7 crossed mice. \*\*,  $P < 0.01$  versus non-exercised CryAB<sup>R120G</sup>xAtg7xtTA-vehicle treated group; #,  $P < 0.05$  versus non-exercised CryAB<sup>R120G</sup>xAtg7xtTA-chloroquine treated group; \$,  $P < 0.05$  versus exercised CryAB<sup>R120G</sup>xAtg7xtTA-chloroquine treated group by Tukey's *post hoc* test. **(C, D)** Immunofluorescence analysis of heart sections showing punctate LC3 staining (green) in 7-month-old voluntary exercised CryAB<sup>R120G</sup>xAtg7xtTA and control non-exercised CryAB<sup>R120G</sup>xAtg7xtTA hearts. Tnl (red) was used to identify cardiomyocytes. DAPI (blue) was used to identify nuclei (60X). **(C)** Quantification of LC3 dots per microscopic field (220,000 μm<sup>2</sup>) in LV. **(E)** Representative transmission electron micrographs of hearts from control and

voluntarily exercised Atg7-induced CryAB<sup>R120G</sup> triple Tg mice showing increased amphisomes (\*) and autophagosomes (denoted by arrow).

A

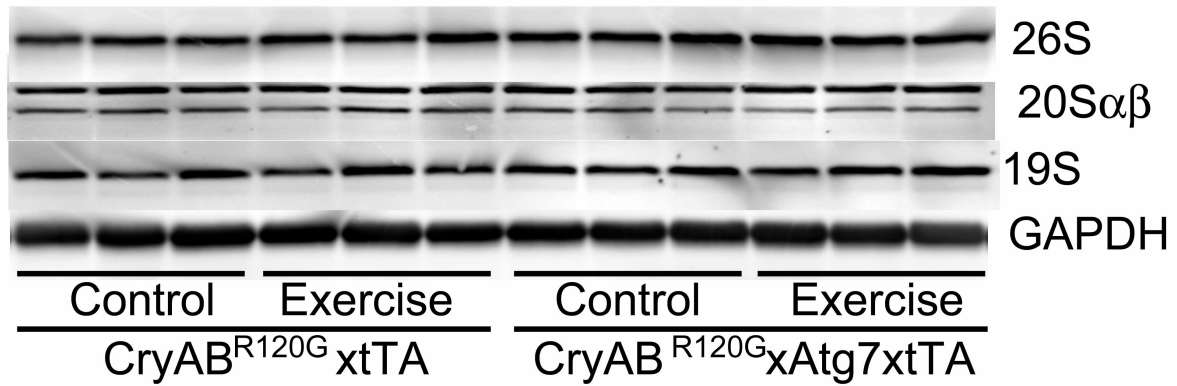

B

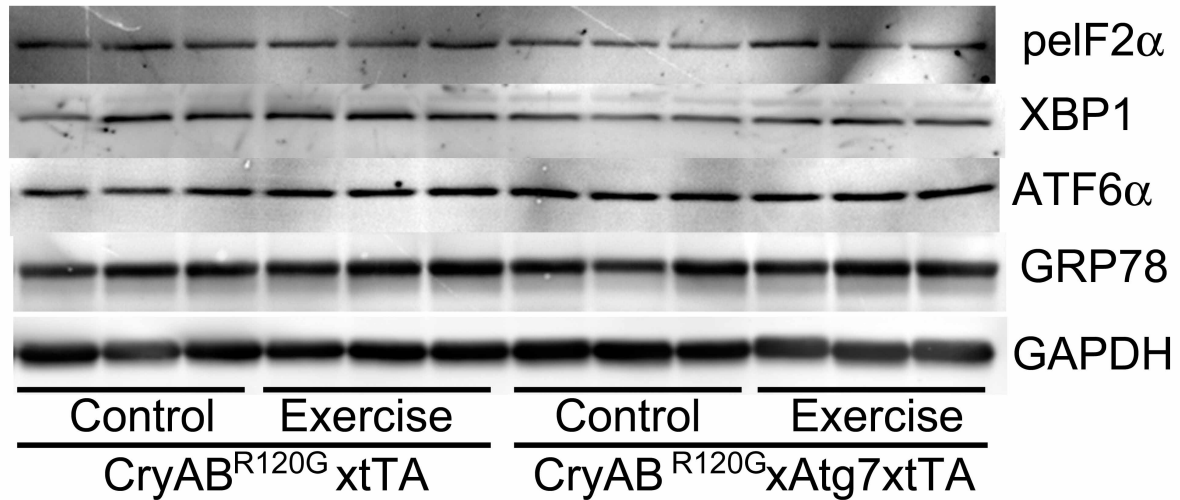

**Supplemental Figure 6:** Expression of Ubiquitin Proteasome System (UPS) and Unfolded Protein Response (UPR) markers. **(A)** Representative Western blot showing UPS proteins 19S, 20S and 26S expression levels in cardiac extracts from exercised and control non-exercised CryAB<sup>R120G</sup>xtTA as well as CryAB<sup>R120G</sup>xAtg7xtTA mice. **(B)** Representative Western blot showing UPR marker proteins Atf6 $\alpha$ , pelf2 $\alpha$ , XBP1 and GRP78 expression levels in cardiac extracts from exercised and control non-exercised CryAB<sup>R120G</sup>xtTA as well as CryAB<sup>R120G</sup>xAtg7xtTA mice.
